# Supplementary material for: The vital function of Fe3O4@Au nanocomposites for hydrolase biosensor design and its application in detection of methyl parathion
Source: Royal Society of Chemistry journal article supplement (doi:10.1039/c2nr33107a), 2012-11-26
Supplement: c2nr33107a.pdf [file c2nr33107a.pdf]

## Supporting material

### The Vital Function of Au-nanoparticles for Hydrolase Biosensor Design and Its Application in Detection of Methyl Parathion

Yuting Zhao,<sup>a</sup> Weiying Zhang,<sup>b</sup> Dan Du<sup>\*a</sup> and Yuehe Lin<sup>\*b</sup>

<sup>a</sup> *Key Laboratory of Pesticide and Chemical Biology of Ministry of Education, College of Chemistry, Central China Normal University, Wuhan 430079, PR China.*

*E-mail: [dudan@mail.ccnu.edu.cn](mailto:dudan@mail.ccnu.edu.cn); Fax: +86 27 67867953; Tel: +86 27 67867958*

<sup>b</sup> *Pacific Northwest National Laboratory, Richland, WA 99352, USA.*

*E-mail: [yuehe.lin@pnnl.gov](mailto:yuehe.lin@pnnl.gov); Fax: +1 509 371 6241; Tel: +1 509 371 6241*

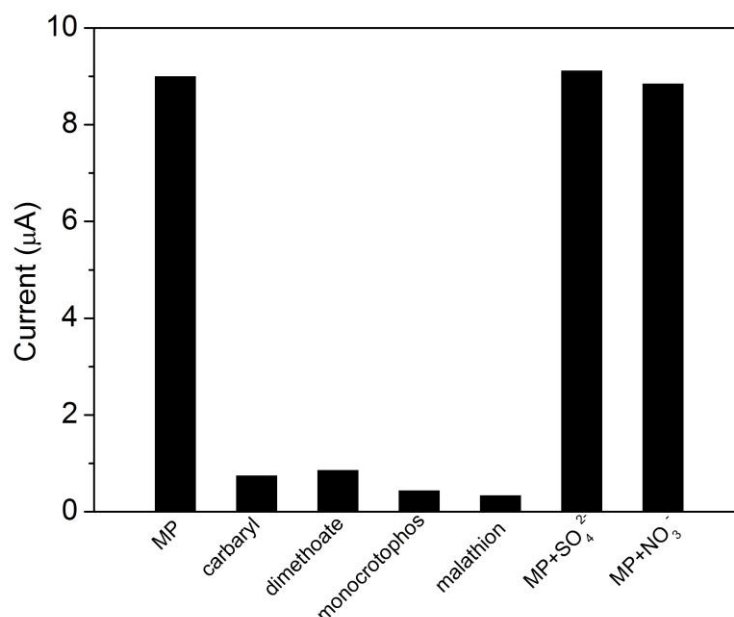

**Fig.S1.** Amperometric response of various interferences by the MPH/Au-Fe<sub>3</sub>O<sub>4</sub>/SPE. Experiments were performed with PBS (pH 7.4) containing 100 ng/mL methyl parathion, 100 ng/mL carbaryl, 100 ng/mL dimethoate, 100 ng/mL monocrotophos, 100 ng/mL malation, and 100 ng/mL methyl parathion in the presence of 0.1 M SO<sub>4</sub><sup>2-</sup>, and 0.1M NO<sub>3</sub><sup>-</sup>, respectively.

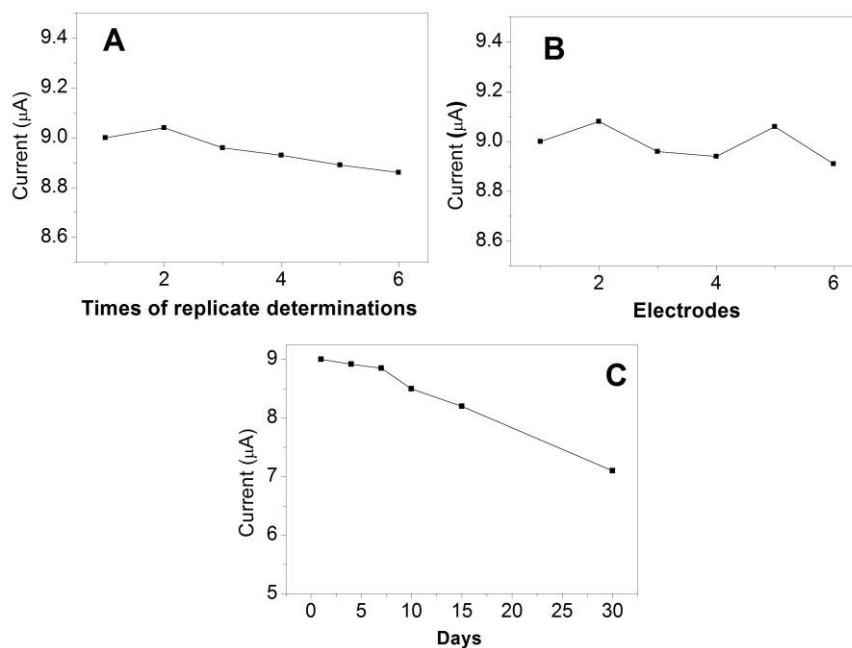

**Fig.S2.** (A) Six replicate determinations for one MPH/Au-Fe<sub>3</sub>O<sub>4</sub>/SPE electrode in 100 ng/mL methyl parathion. (B) Reproducibility of the enzyme electrodes. Experiment was done on six different electrodes at the same condition. (C) Stability of the MPH/Au-Fe<sub>3</sub>O<sub>4</sub>/SPE electrode
